# Supplementary material for: The SWine IMputation (SWIM) haplotype reference panel enables nucleotide resolution genetic mapping in pigs
Source: PubMed Central journal article supplement (PMC10229620; doi:10.1038/s42003-023-04933-9), 2023-05-30
Supplement: 42003_2023_4933_MOESM3_ESM.pdf [file 42003_2023_4933_MOESM3_ESM.pdf]

## Description of Additional Supplementary Data

**File Name:** Supplementary Data 1

**Description:** Sources of sequence data used in this study for analysis and imputation.

**File Name:** Supplementary Data 2

**Description:** Accession numbers for SRA samples used in this study.

**File Name:** Supplementary Data 3

**Description:** GWAS significant SNPs ( $P < 5 \times 10^{-8}$ ) for backfat thickness using SNP chip.

**File Name:** Supplementary Data 4

**Description:** GWAS significant SNPs ( $P < 5 \times 10^{-8}$ ) for backfat thickness using imputed genotypes.

**File Name:** Supplementary Data 5

**Description:** GWAS significant SNPs ( $P < 5 \times 10^{-8}$ ) for body length using SNP chip.

**File Name:** Supplementary Data 6

**Description:** GWAS significant SNPs ( $P < 5 \times 10^{-8}$ ) for body length using imputed genotypes.

**File Name:** Supplementary Data 7

**Description:** Source data for Figure 1a.

**File Name:** Supplementary Data 8

**Description:** Source data for Figure 1b.

**File Name:** Supplementary Data 9

**Description:** Source data for Figure 2.

**File Name:** Supplementary Data 10

**Description:** Source data for Figure 3.

**File Name:** Supplementary Data 11

**Description:** Source data for Figure 4.

**File Name:** Supplementary Data 12

**Description:** Source data for Figure 6c.
